# Supplementary material
Source: PubMed Central journal article supplement (PMC7135984)
Supplement: supp_AC119.011747_156896_1_supp_438238_q1yywh.pdf [file supp_AC119.011747_156896_1_supp_438238_q1yywh.pdf]

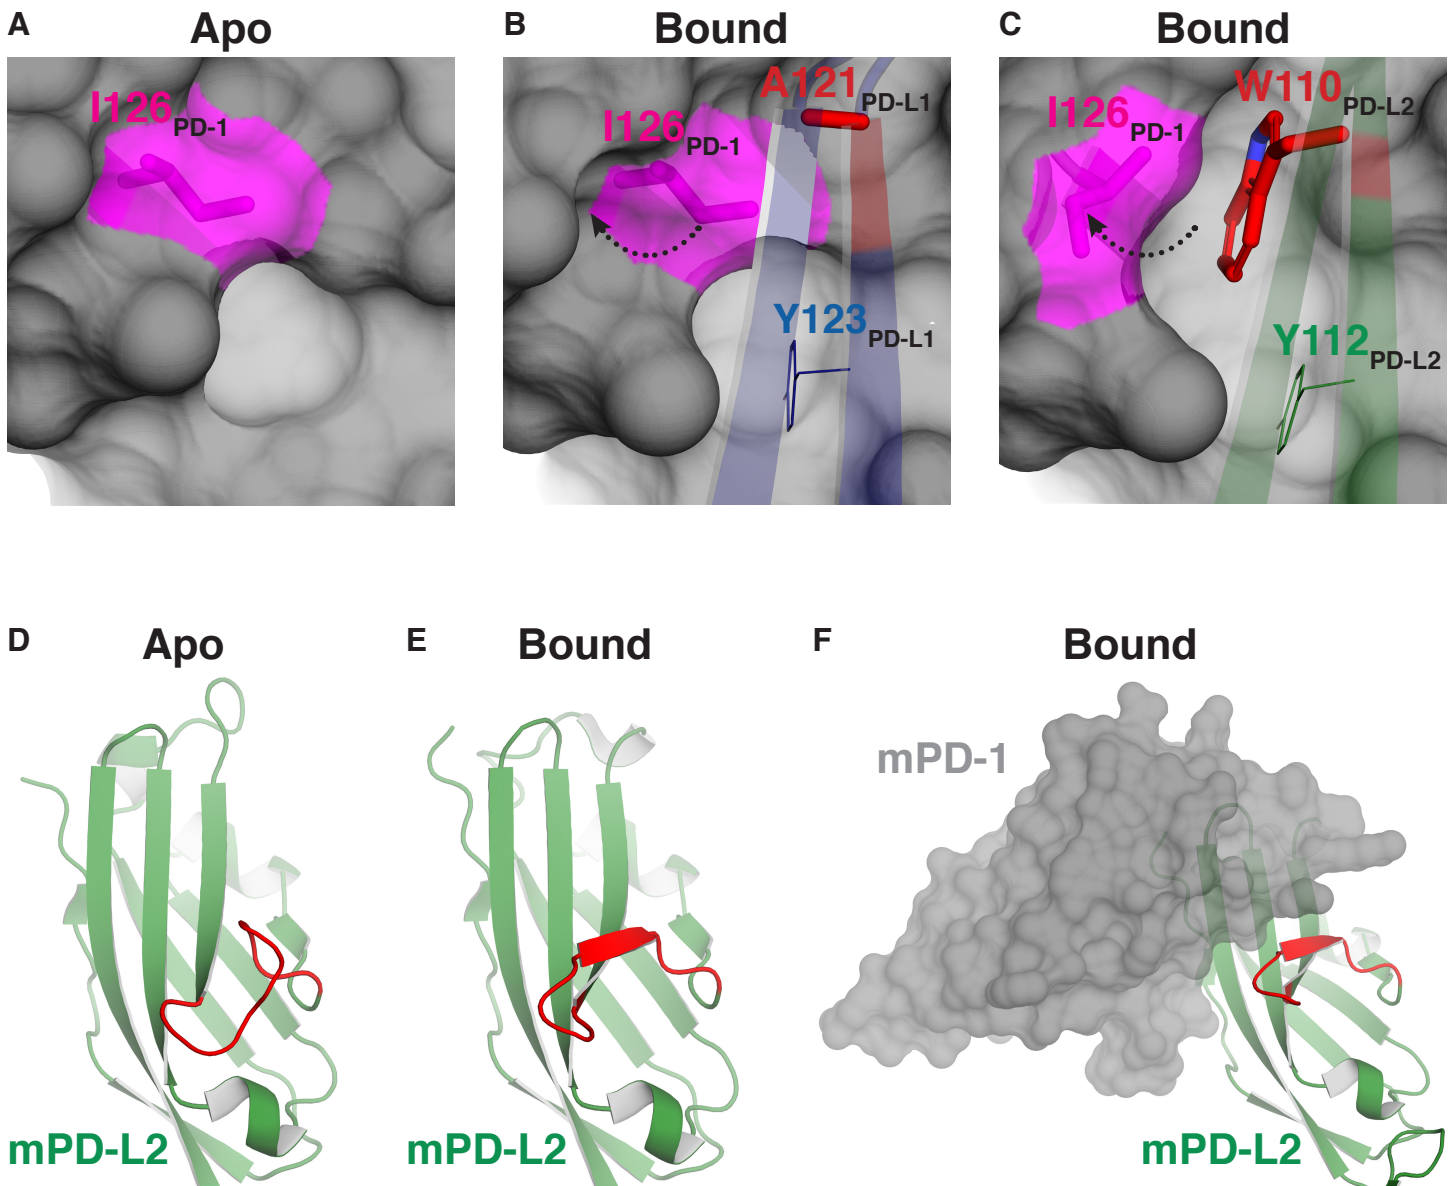

**Figure S1. Unique structural features of PD-L2.** (A-C) I126PD-1 rotates to accommodate W110PD-L2. The position of I126PD-1 (magenta) in the Apo state (PDB ID: 1NPU) (A), hPD-L1 bound state (PDB ID: 3BIK) (B), versus in the mPD-L2 bound state (PDB ID: 3BP5) (C). (D and E) Structures of the Apo (PDB ID: 3BOV) and PD-1 bound (PDB ID: 3BP5) states showing the reorientation of the C–D loop (red) into a “latch.” (F) Positioning of the PD-L2 latch around a surface representation of the mPD-1 IgV domain (grey).

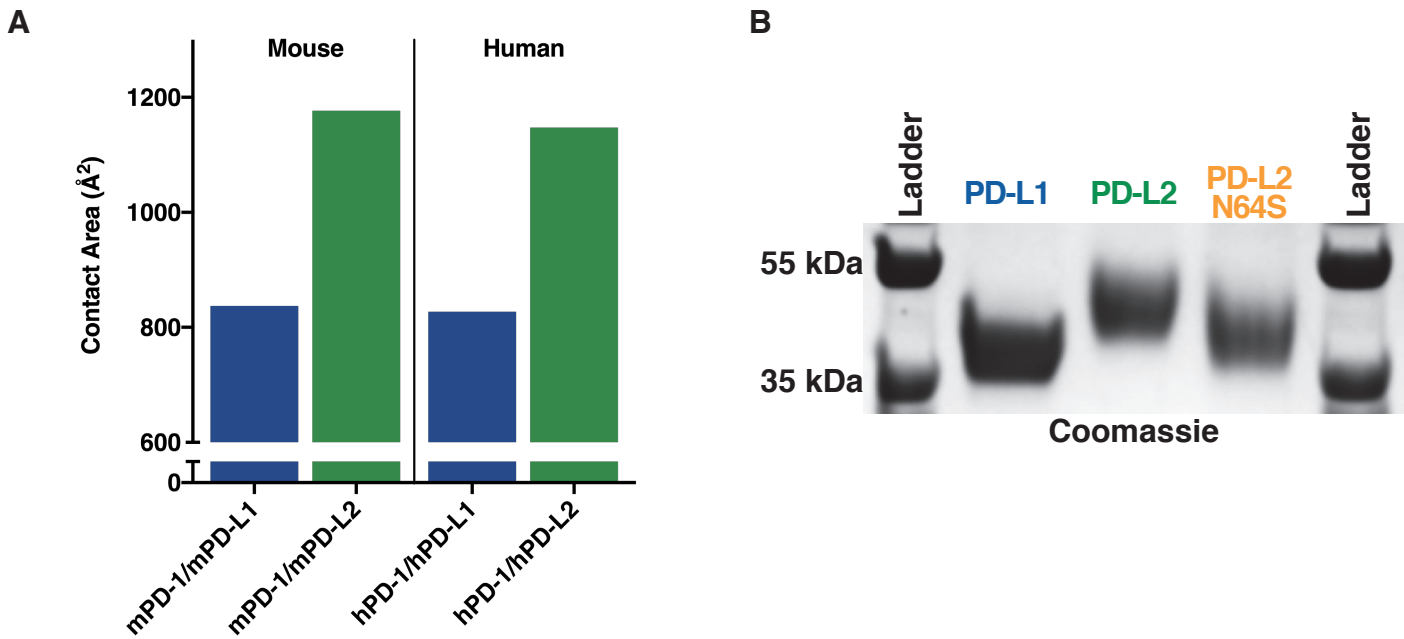

**Figure S2. PD-L2 makes more contact with PD-1 and is glycosylated on N64.** (A) Total buried surface areas of mPD-1/mPD-L1 (PDB ID: 3BIK), mPD-1/mPDL2 (PDB ID 3BP5), hPD-1/hPD-L1 (PDB ID: 4ZQK), and hPD-1/hPD-L2 (20) complexes calculated using Molsoft ICM (35). (B) The indicated PD-ligand ectodomains were expressed in HEK293 cells as secretory proteins, purified from conditioned medium and analyzed by SDS-PAGE (12% polyacrylamide gel). The increased electrophoretic mobility of the N64SPD-L2 substitution indicates N-linked glycosylation.

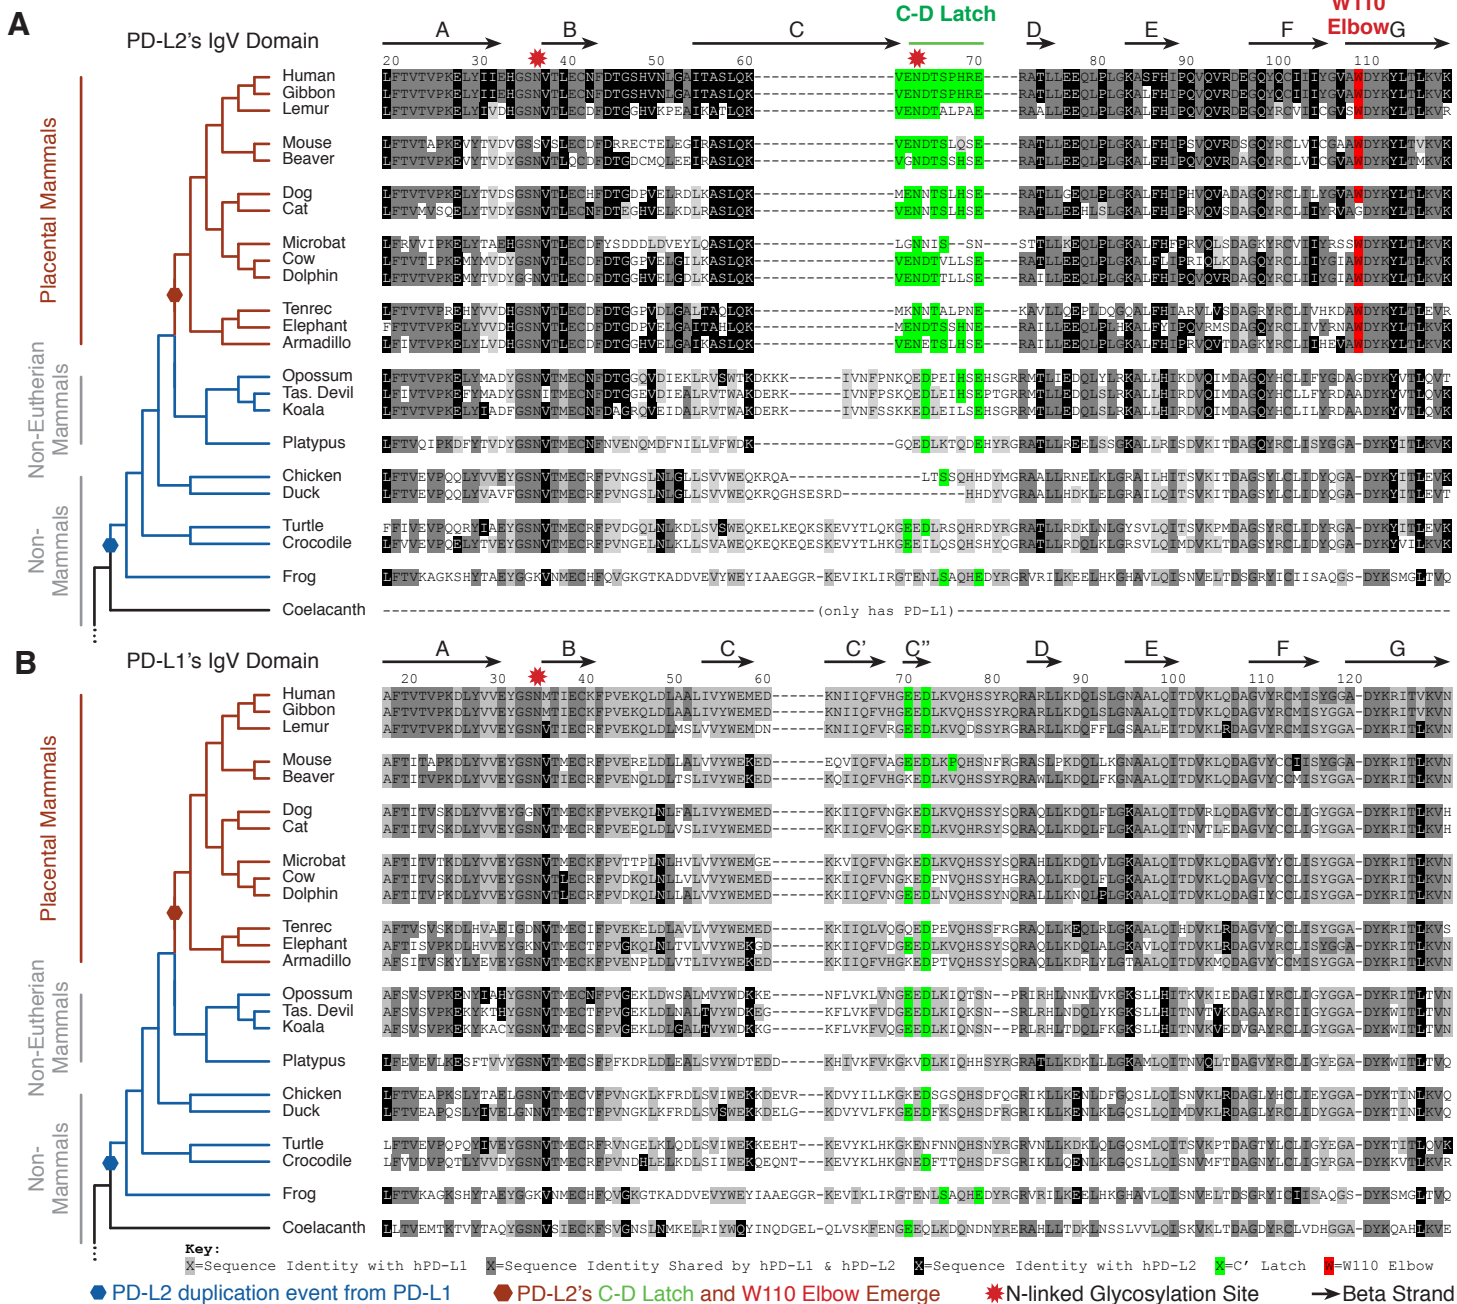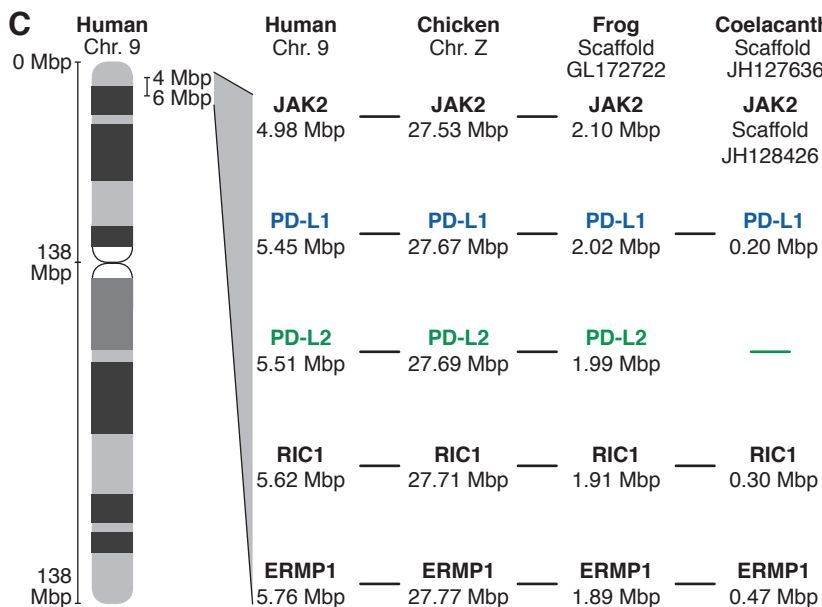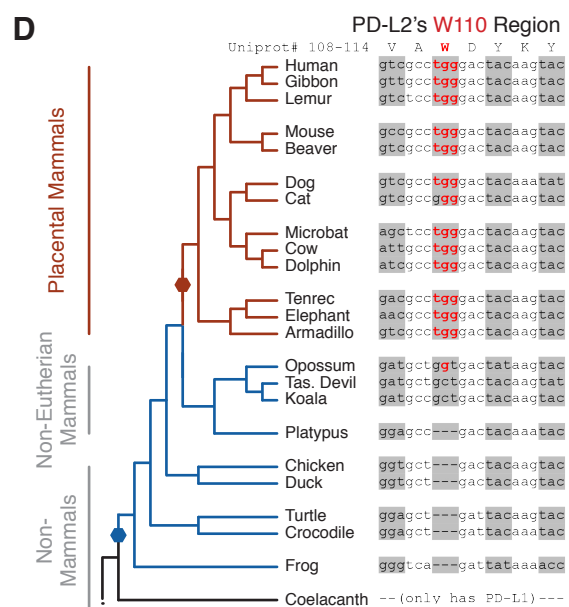

**Figure S3. PD-ligand evolution.** (A and B) Phylogenetic analysis of the IgV domains of PD-L2 (A) and PD-L1 (B). The PD-L2 IgV domain remains highly similar to the primordial PD-L1 sequence from amphibians to marsupial mammals (blue phylogenetic branches). The PD-L2 IgV domain diverged from that of PD-L1 when it acquired an “elbow” and “latch” region upon placental mammal radiation (red phylogenetic branches). (C) Synteny analysis of the PDJ-amplicon of the human 9p24.1 locus (36,37). (D) Phylogenetic DNA sequence analysis of the PD-L2 W110 “elbow.” Feline reversion to a Gly codon occurred by a single nucleotide conversion, dissimilar to the Opossum Gly codon.

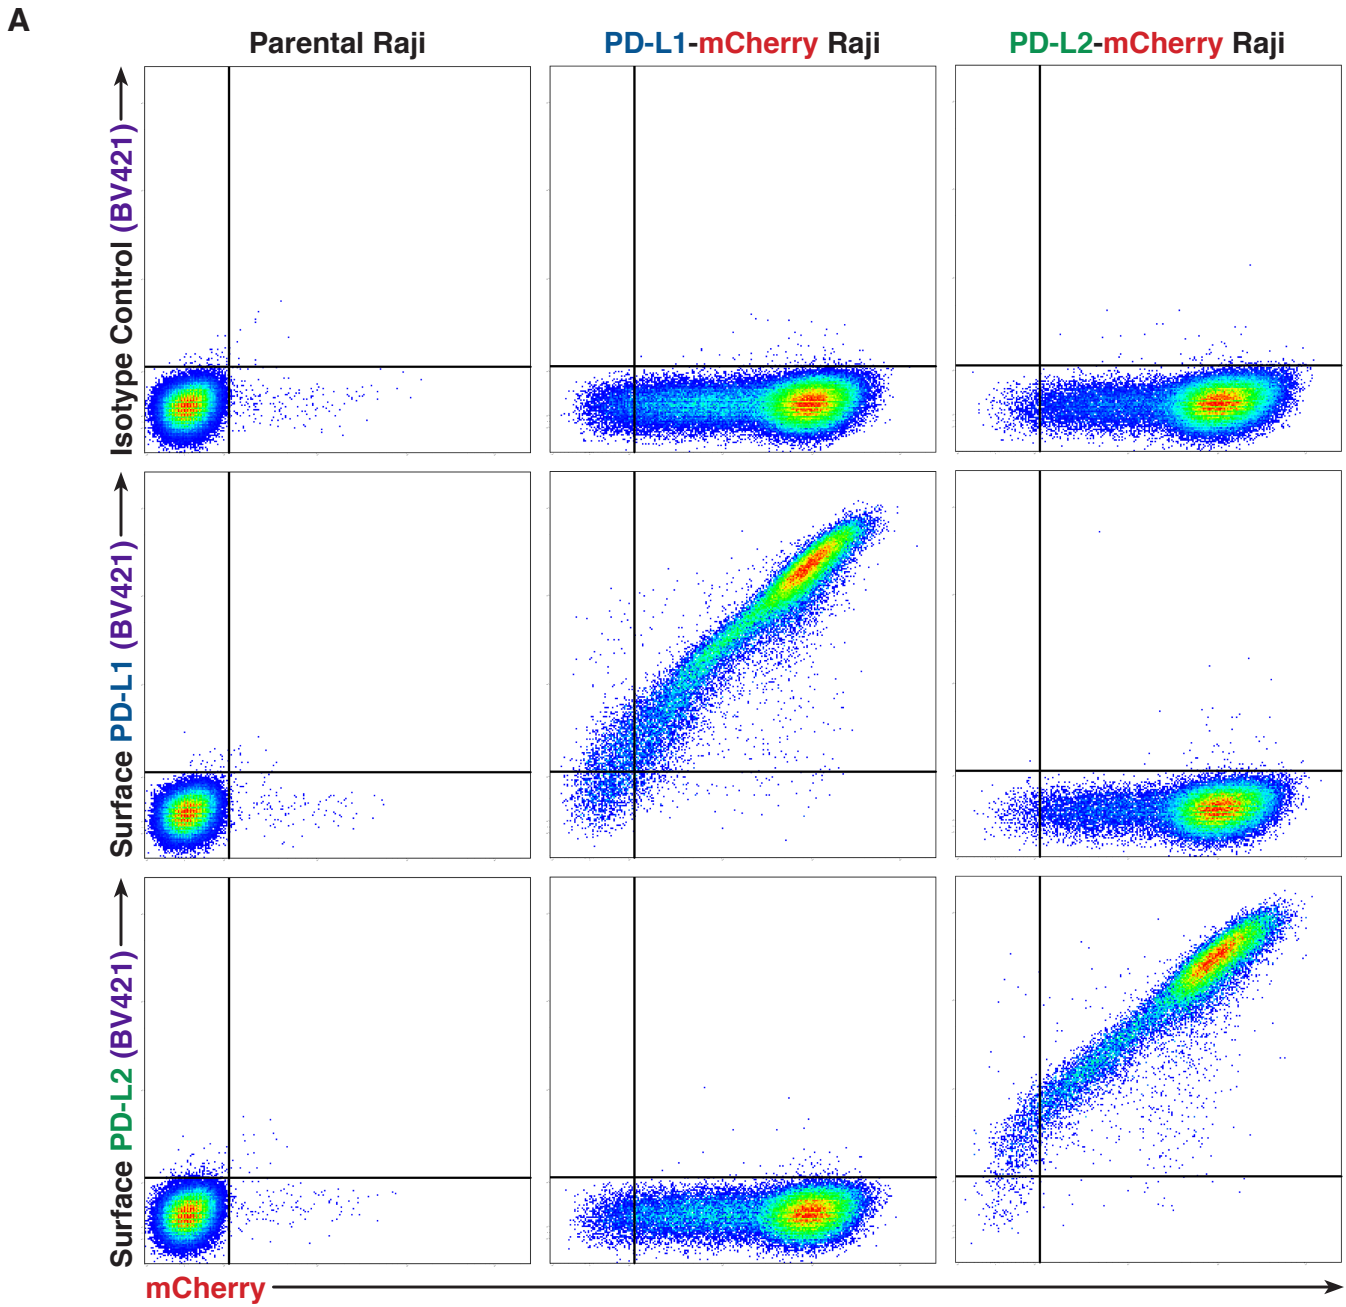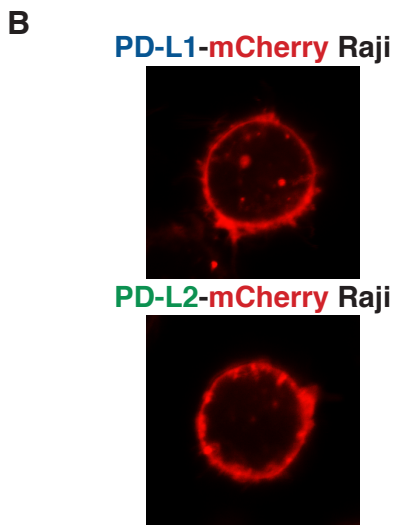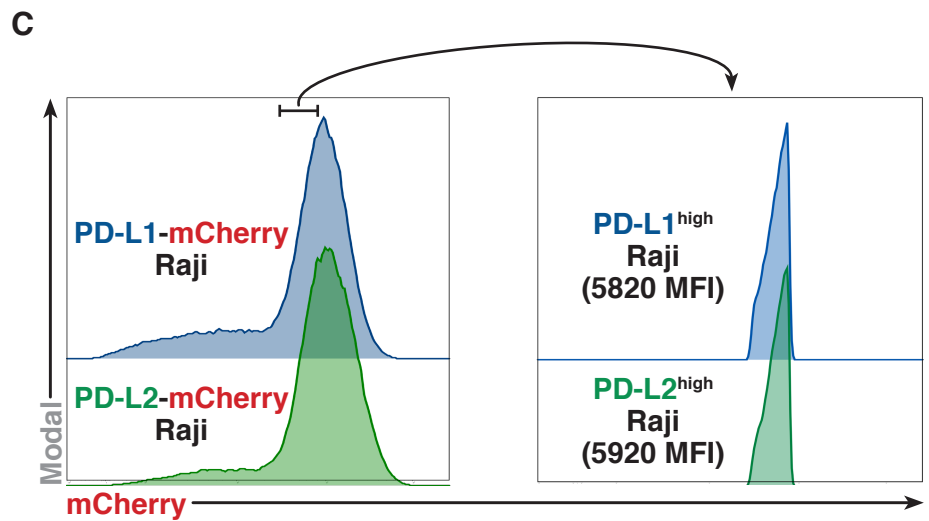

**Figure S4. PD-ligandhigh Raji B cell preparation and surface expression validation.** (A) Flow cytometry analysis of PD-ligand surface expression for parental, PD-L1-mCherry, and PD-L2-mCherry Raji B cells using BV421 conjugated mAbs. (B) Live cell confocal images of Raji B cells transduced with lentiviruses directing expression of PD-ligand-mCherry. (C) Histogram of PD-ligand-mCherry expression in Raji B cells transduced with lentivirus. Shown is the narrow gate used to assure equivalent expression of each ligand on cells used in primary T cell conjugation assays (Figure 4J).

| Common name     | Scientific name                 | DNA sequence | Protein sequence                   |                |
|-----------------|---------------------------------|--------------|------------------------------------|----------------|
|                 |                                 | PDL2         | PDL2                               | PDL1           |
| Human           | <i>Homo sapiens</i>             | XM_005251600 | XP_005251657                       | NP_054862.1    |
| Gibbon          | <i>Nomascus leucogenys</i>      | XM_003273827 | XP_003273875                       | XP_003273874   |
| Lemur           | <i>Microcebus murinus</i>       | XM_012737993 | XP_012593447                       | XP_012593388   |
| Mouse           | <i>Mus musculus</i>             | NM_021396    | NP_067371                          | NP_068693      |
| Beaver          | <i>Castor canadensis</i>        | XM_020159594 | XP_020015184                       | XP_020015185   |
| Dog             | <i>Canis lupus familiaris</i>   | XM_022421863 | XP_022277571                       | NP_001278901   |
| Cat             | <i>Felis catus</i>              | -            | XP_006939100                       | XP_006939101   |
| Microbat        | <i>Myotis lucifugus</i>         | XM_014460401 | XP_023614190                       | XP_005861392   |
| Cow             | <i>Bos taurus</i>               | -            | XP_024851656                       | NP_001156884   |
| Dolphin         | <i>Tursiops truncatus</i>       | XM_019934810 | XP_019790369                       | XP_004313647   |
| Tenrec          | <i>Echinops telfairi</i>        | XM_013005646 | XP_012861100                       | XP_012861098   |
| Elephant        | <i>Loxodonta africana</i>       | XM_023545365 | XP_023401133<br>ENSLAFT00000037236 | XP_010586356   |
| Armadillo       | <i>Dasypus novemcinctus</i>     | XM_023588443 | XP_023444211                       | XP_023444213   |
| Opossum         | <i>Monodelphis domestica</i>    | XM_007499547 | XP_007499609                       | XP_007499605   |
| Tasmanian Devil | <i>Sarcophilus harrisii</i>     | XM_012544068 | XP_012399522                       | XP_012399523   |
| Koala           | <i>Phascolarctos cinereus</i>   | XM_021006311 | XP_020861970                       | XP_020861971   |
| Platypus        | <i>Ornithorhynchus anatinus</i> | XM_007655600 | XP_007653790                       | XP_001506048   |
| Chicken         | <i>Gallus gallus</i>            | XM_004949068 | XP_004949125                       | XP_424811      |
| Duck            | <i>Anas platyrhynchos</i>       | XM_021267840 | XP_021123515                       | XP_012948976   |
| Turtle          | <i>Chrysemys picta bellii</i>   | XM_005296800 | XP_005296857                       | XP_005296856   |
| Crocodile       | <i>Crocodylus porosus</i>       | XM_019555441 | XP_019410986                       | XP_019410914   |
| Frog            | <i>Xenopus tropicalis</i>       | XM_018090958 | XP_01794644                        | XP_017946448   |
| Coelacanth      | <i>Latimeria chalumnae</i>      | -            | -                                  | XP_014349176.1 |

**Supplementary Table 1. Protein and DNA sequence accession numbers.**

## Supplementary References

35. Abagyan, R., Totrov, M., and Kuznetsov, D. (1994) ICM—A new method for protein modeling and design: applications to docking and structure prediction from distorted native conformation. *J. Comput. Chem.* 15, 488–506
36. Green, M. R., Monti, S., Rodig, S. J., Juszczynski, P., Currie, T., O'Donnell, E., Chapuy, B., Takeyama, K., Neuberg, D., Golub, T. R., Kutok, J. L., and Shipp, M. A. (2010) Integrative analysis reveals selective 9p24.1 amplification, increased PD-1 ligand expression, and further induction via JAK2 in nodular sclerosing Hodgkin lymphoma and primary mediastinal large Bcell lymphoma. *Blood* 116, 3268–3277
37. Barrett, M. T., Anderson, K. S., Lenkiewicz, E., Andreozzi, M., Cunliffe, H. E., Klassen, C. L., Dueck, A. C., McCullough, A. E., Reddy, S. K., Ramanathan, R. K., Northfelt, D. W., and Pockaj, B. A. (2015) Genomic amplification of 9p24.1 targeting JAK2, PD-L1, and PD-L2 is enriched in high-risk triple negative breast cancer. *Oncotarget.* 6, 26483–26493
